# Supplementary material
Source: PubMed Central journal article supplement (PMC9442496)
Supplement: mmc1.pdf [file mmc1.pdf]

# THE LANCET

## Respiratory Medicine

### Supplementary appendix

This appendix formed part of the original submission and has been peer reviewed. We post it as supplied by the authors.

Supplement to: Keir HR, Long MB, Abo-Leyah H, et al. Dipeptidyl peptidase-1 inhibition in patients hospitalised with COVID-19: a multicentre, double-blind, randomised, parallel-group, placebo-controlled trial. *Lancet Respir Med* 2022; published online Sept 5. [https://doi.org/10.1016/S2213-2600\(22\)00261-2](https://doi.org/10.1016/S2213-2600(22)00261-2).

## SUPPLEMENTARY APPENDIX

### **Dipeptidyl Peptidase-1 Inhibition in Patients Hospitalized with COVID-19: a Multicentre Randomized Double-Blind Placebo Controlled Trial**

Holly R Keir<sup>1\*</sup>, Merete B Long<sup>1\*</sup>, Hani Abo-Leyah<sup>1</sup>, Yan Hui Giam<sup>1</sup>, Thenmalar Vadiveloo<sup>2</sup>,  
Thomas Pembridge<sup>1</sup>, Rebecca C Hull<sup>3</sup>, Lilia Delgado<sup>1</sup>, Margaret Band<sup>1</sup>, Fiona McLaren-Neil<sup>1</sup>,  
Simon Adamson<sup>1</sup>, Eva Lahnsteiner<sup>1</sup>, Amy Gilmour<sup>1</sup>, Chloe Hughes<sup>1</sup>, Benjamin JM New<sup>1</sup>,  
David Connell<sup>1</sup>, Rebecca Dowey<sup>3</sup>, Helena Turton<sup>3</sup>, Hollian Richardson<sup>1</sup>, Diane Cassidy<sup>1</sup>, Jamie  
Cooper<sup>4</sup>, Jay Suntharalingam<sup>5</sup>, Lavanya Diwakar<sup>6</sup>, Peter Russell<sup>7</sup>, Jonathan Underwood<sup>8</sup>,  
Alexander Hicks<sup>9</sup>, Davinder P S Dosanjh<sup>10</sup>, Beth Sage<sup>11</sup>, Devesh J Dhasmana<sup>12</sup>, Mark Spears<sup>1</sup>,  
AA Roger Thompson<sup>3</sup>, Christopher Brightling<sup>13</sup>, Andrew Smith<sup>14</sup>, Manish Patel<sup>14</sup>, Jacob  
George<sup>1</sup>, Alison M Condliffe<sup>3</sup>, Amelia Shoemark<sup>1</sup>, Graeme MacLennan<sup>2</sup>, James D Chalmers<sup>1</sup>,  
on behalf of the STOP-COVID19 Investigators<sup>#</sup>

## List of the STOP-COVID19 investigators

### NHS Tayside

**Professor James Chalmers**, Principal Investigator

Dr Hani Abo-Leyah, Dr Benjamin JM New, Dr Christine Almaden-Boyle, Dr David Connell, Jennifer Taylor, Jodie Strachan, Heather Loftus, Lesley Young, Angela Strachan

### Tayside Clinical Trials Unit

and

Tayside Medical Sciences Centre,

University of Dundee

**Margaret Band**, Senior Trial Manager, **Fiona McLaren-Neil**, Trial Manager, Kristina Pilvinyte, Simon Adamson, Eva Lahnsteiner, Petra Rauchhaus, Fiona Hogarth, Jacob George, Tricia Burns, Elizabeth Coote, Marney Keiller

### NHS Lanarkshire

**Dr Manish Panel** – Principal investigator

Dr Andrew Smith

### NHS Highland

**Dr Elizabeth Sage** - Principal Investigator

### NHS Grampian

**Dr Jamie Cooper** - Principal investigator

Dr David Miller

### University Hospitals Birmingham

NHS Foundation Trust

**Dr Davinder Dosanjh** - Principal Investigator

Dr Benjamin Sutton

### Cardiff and Vale

Health Board

---

**Dr Jonathan Underwood** - Principal Investigator

**University Hospital of Wales** - Sharon Frayling (research nurse), Matthew Haynes (research nurse), Lauren Broad (research nurse), Laura Jones (research nurse), Karen Rahilly (research nurse), Catherine Oliver (research nurse), Terriann Evans (research nurse), Andrea Balan (research officer), Dr Rhys Davies (SpR), Dr Donal Forde (SpR), Dr Clemency Nye (SpR)

**University Hospital Llandough** - Dr Haboubi (Consultant), Zoe Hilton (research nurse), Jennie Williams (research nurse), Alison McQueen (research officer)

---

**NHS Forth Valley**

**Dr Mark Spears** - Principal Investigator

Dr Ian Edmond (ICU Consultant), Dario Salutous (Research Nurse), Laura McGenily (Research Nurse), Rhona Scott (Clinical Trials Pharmacist), Eilidh Henderson (Clinical Trials Pharmacy Technician)

---

**University Hospital Aintree**

**Liverpool**

**Dr Andrea Collins** - Principal Investigator

---

**NHS Fife**

**Dr Devesh Dhasmana** - Principal Investigator

Dr Patrick Liu, Ana Morrow, Mandy Couser, Fleur Davey

---

**Portsmouth Hospitals NHS Trust**

**Dr Alexander Hicks** - Principal Investigator

Laura Wiffen, Lauren Fox, Mohamed Abdelrahim, Alexander Darbyshire, Elena Cowen, Megan Rowley, Benjamin Giles, Dr Yingjia Yang, Tom Brown, Hitasha Rupani, Elizabeth Hawes, Debi Barnes Fiona Brogan, Roneleeh Bungue-Tuble, Serena Howe, Charlotte Turner, Sonia Baryschpolec, Bev Longhurst, Maria Moon, Lynn Watkins, Michelle Baker-Moffatt, Lisa Murray, Yasmin Harrington-Davies, Kate Burrows, Chrissie Minnis, Mary Wands, Adefunke Bamgboye, Charlotte Wong

---

**University Hospitals of Leicester**

**NHS Trust**

**Professor Christopher Brightling** - Principal Investigator

---

---

Sub-PIs: Sarah Diver, Richard Russell, Hamish McAuley, Omer Elneima, Ahmed Yousuf

Research nurses: Paula McCourt, Beverley Hargadon, Sarah Parker, Michelle Bourne

---

**Royal United Hospitals Bath**

**NHS Foundation Trust**

**Dr Jay Suntharalingam** - Principal Investigator

Dr Tom Hartley, Dr Vidan Masan, Dr Sharon Sturney, Dr Rob MacKenzie Ross, Dr Clare Marchand,

Dr Rebecca Mason, Katie White, Alison Kirby

---

**Frimley Park**

**Dr Manjula Meda** - Principal Investigator

---

**University Hospitals of North Midlands**

**NHS Trust**

**Dr Lavanya Diwakar** - Principal Investigator

---

**Princess Alexandra Hospital**

**NHS Trust**

**Dr Peter Russell** - Principal Investigator

Joanne Finn (Research Nurse), Sophie Harris (Clinical Trials Practitioner), Carol Muir (Research Nurse), Gemma Cook (Senior Pharmacy Clinical Trials Technician), Nikki Staines (Lead Research Nurse) Chris Cook (Head of Research, Development & Innovation)

---

**Sheffield Teaching Hospitals**

**NHS Foundation Trust**

**Dr A.A. Roger Thompson** - Principal Investigator

Professor Alison Condliffe, Rebecca Hull, Rebecca Dowey, Helena Turton, Paul Collini, Zoé Gabriel, Simon Hardman, Helen Newell, Janet Middle, Phillip Simpson, Hayley Colton, Joann Barker, Katie Birchall, Kate Harrington, Kay Housley, Rebecca Lenagh, Jayne Willson, Joan Wesonga, Rachel Whitham, Sarah Bird, Yvonne Jackson, Angeline Mbuyisa, Samantha Anderson, Anna Wilson, Faith Kibutu, Sara Walker, Kay Cawthron, Irene Macharia, Lynne Smart, Anna Emery, Alice Howell, Elizabeth Hurditch, Amber Ford, Kim Turner, Lisa Watson  
Helen Bowler, Tracy Jackson, Carol Jaques, Nichole Dyer, Shelley Ducker, Vicky Goodall,

---

### Full Inclusion criteria

- Male or female
- ≥16 years of age
- SARS-CoV-2 infection (clinically suspected<sup>+</sup> or laboratory confirmed<sup>\*</sup>).
- Admitted to hospital as in-patient less than 96 hours prior to randomisation<sup>^</sup>
- Illness of any duration, and at least one of the following:
  - Radiographic infiltrates by imaging (e.g. chest x-ray, computed tomography (CT) scan)  
OR
  - Evidence of rales/crackles on physical examination  
OR
  - Peripheral capillary oxygen saturation (SpO<sub>2</sub>) ≤94% on room air prior to randomization  
OR
  - Requiring supplemental oxygen.  
OR
  - Lymphocyte count <1 x 10<sup>9</sup> cells per litre (L)
- Participant (or legally authorized representative) provides written informed consent
- Able to take oral medication
- Participant (or legally authorised representative) understands and agrees to comply with planned trial procedures.

<sup>\*</sup>Laboratory-confirmed: SARS-CoV-2 infection as determined by polymerase chain reaction (PCR), or other commercial or public health assay in any specimen < 96 hours prior to randomization.

<sup>+</sup>Clinically suspected: SARS-CoV-2 infection should be suspected when a patient presents with (i) typical symptoms (e.g. influenza-like illness with fever and muscle pain, or respiratory illness with cough and shortness of breath); and (ii) compatible chest X-ray findings (consolidation or ground-glass shadowing); and (iii) alternative causes have been considered unlikely or excluded (e.g. heart failure, influenza). However, the diagnosis remains a clinical one based on the opinion of the managing doctor

^Where a patient has been admitted to hospital for a non COVID-19 reason and develops COVID-19 symptoms whilst an in-patient, randomisation may occur up to 96 hours from onset of symptoms.

### **Full Exclusion criteria**

- Alanine aminotransferase (ALT) and/or aspartate aminotransferase (AST) > 5 times the upper limit of normal, result within 72 hours of randomization (the result closest to randomization should be used if several results are available).
- History of severe liver disease
- Stage 4 severe chronic kidney disease or requiring dialysis (i.e. eGFR < 30), result within 72 hours of randomization (the result closest to randomization should be used if several results are available)
- Absolute neutrophil count less than  $1.0 \times 10^9$  cells per L within 72 hours of randomization (the result closest to randomization should be used if several results are available)
- Current treatments with potent Cyp3A4 inducers/inhibitors (e.g Itraconazole, Ketoconazole, diltiazem, verapamil, phenytoin or rifampicin)
- HIV treatments - current treatment with protease/integrase inhibitors or non-nucleoside reverse transcriptase inhibitors\*
- Pregnant or breast feeding.
- Anticipated transfer to another hospital which is not a trial site within 24 hours.
- Allergy to Brensocatib
- Use of any investigational drug within five times of the elimination half-life after the last trial dose or within 30 days, whichever is longer. Co-enrolment with COVID-19 trials is allowed as per co-enrolment agreements and/or individual decision by the CI.

Women of child-bearing potential must be willing to have pregnancy testing prior to trial entry.

### **Adverse events and adverse events of special interest**

Each investigator was responsible for the detection and documentation of events meeting the criteria and definition of an adverse event. Patients were reviewed regularly whilst in hospital and telephone calls performed on days 3, 5, 8, 11, 15 and 29 in patients not in hospital at these time points in order to detect and document adverse events.

Adverse events of special interest (AESIs) were monitored throughout the trial and included hyperkeratosis, dental complications, and infections other than COVID-19,

including serious infections. These AEs were pre-specified based on the mechanism of action for Brensocatib. Brensocatib inhibits dipeptidyl peptidase 1 (DPP1; cathepsin C) resulting in reduced levels of neutrophil serine proteases. Papillon-Lefèvre Syndrome (PLS) is a rare genetic disorder with complete or near complete absence of DPP1 activity. It is characterized by palmoplantar hyperkeratosis and periodontal disease. Patients with PLS do not appear to be at increased risk of infections but since neutrophil responses to bacterial infections are considered an important part of the immune response and NSPs participate in such responses, observation for bacterial infections is considered an important part of safety assessments with DPP1 inhibitors.



## Supplementary results

|                        | Placebo<br>N=214 | Brensocaticib<br>N=192 |
|------------------------|------------------|------------------------|
| Enrolled in RECOVERY   | 65(30.4)         | 49(25.5)               |
| Enrolled in REMAP CAP  | 4(1.9)           | 5(2.6)                 |
| Low-dose Dexamethasone | 171(79.9)        | 155(80.7)              |
| Azithromycin           | 12(5.6)          | 4(2.1)                 |
| Tocilizumab            | 7(3.3)           | 7(3.6)                 |
| Aspirin                | 11 (5.1)         | 12 (6.3)               |
| Colchicine             | 8 (3.7)          | 5 (2.6)                |
| Convalescent plasma    | 7 (3.3)          | 8 (4.2)                |
| REGN-COV2              | 5 (2.3)          | 3 (1.6)                |
| Remdesivir             | 51(23.8)         | 47(24.5)               |
| Antibiotics            | 133(62.1)        | 113(58.9)              |

Table S1. Co-medications and COVID-19 treatments received. \*Numbers in cells are n(%)

### Subgroup analyses of the primary outcome

The primary endpoint was analysed for the following sub-groups:

- (a) Age <65 years and (b)  $\geq$ 65 years
- (a) Male and (b) Female
- Clinical status at baseline (a) 3, (b) 4 and (c) 5
- Enrolment in the RECOVERY trial (a) Yes and (b) No
- Symptom duration (days): (a) <10 and (b)  $\geq$ 10

#### Age (years): (a) <65 years and (b) $\geq$ 65

Table S2 shows the subgroup analysis for age. Overall, there was no evidence that the treatment effect was moderated by age group: interaction effect 1.13 (0.47, 2.72); p-value = 0.731.

Table S2: Subgroup analysis for age group

|                                                                       | Placebo      | Brensocaticib | Age group          | Effect size (99% CI) | p value |
|-----------------------------------------------------------------------|--------------|---------------|--------------------|----------------------|---------|
| Less than 65 years                                                    |              |               |                    |                      |         |
| Not Hospitalized, no limitations on activities                        | 29/121(24.0) | 17/104(16.3)  | Less than 65 years | 0.69(0.42,1.13)      | 0.050   |
| Not Hospitalized, limitations on activities                           | 78/121(64.5) | 73/104(70.2)  | 65 years or more   | 0.77(0.43,1.38)      | 0.252   |
| Hospitalized, not requiring supplemental oxygen                       | 3/121(2.5)   | 4/104(3.8)    | Interaction        | 1.13(0.47,2.72)      | 0.731   |
| Hospitalized, requiring supplemental oxygen                           | 1/121(0.8)   | 1/104(1.0)    |                    |                      |         |
| Hospitalized, on invasive mechanical ventilation or ECMO              | 6/121(5.0)   | 3/104(2.9)    |                    |                      |         |
| Death                                                                 | 2/121(1.7)   | 6/104(5.8)    |                    |                      |         |
| Missing                                                               | 2/121(1.7)   |               |                    |                      |         |
| 65 years and more                                                     |              |               |                    |                      |         |
| Not Hospitalized, no limitations on activities                        | 11/93(11.8)  | 11/86(12.8)   |                    |                      |         |
| Not Hospitalized, limitations on activities                           | 51/93(54.8)  | 39/86(45.3)   |                    |                      |         |
| Hospitalized, not requiring supplemental oxygen                       | 8/93(8.6)    | 3/86(3.5)     |                    |                      |         |
| Hospitalized, requiring supplemental oxygen                           |              | 5/86(5.8)     |                    |                      |         |
| Hospitalized, on non-invasive ventilation or high flow oxygen devices | 1/93(1.1)    |               |                    |                      |         |
| Hospitalized, on invasive mechanical ventilation or ECMO              |              | 2/86(2.3)     |                    |                      |         |
| Death                                                                 | 21/93(22.6)  | 23/86(26.7)   |                    |                      |         |
| Missing                                                               | 1/93(1.1)    | 3/86(3.5)     |                    |                      |         |

\*Adjusted for minimization variables; age and site (using clustered standard errors)

Sex at birth: (a) Male and (b) Female

Table S3 shows the subgroup analysis for gender. Overall, there was no evidence that the treatment effect was moderated by gender: interaction effect 0.91 (0.33, 2.51); p-value = 0.807.

Table S3: Subgroup analysis for gender

|                                                                       | Placebo      | Brensocatib  | Gender      | Effect size (99% CI) | p value |
|-----------------------------------------------------------------------|--------------|--------------|-------------|----------------------|---------|
| <b>Male</b>                                                           |              |              |             |                      |         |
| Not hospitalized, no limitations on activities                        | 25/127(19.7) | 22/125(17.6) | Male        | 0.76(0.40,1.43)      | 0.263   |
| Not hospitalized, limitations on activities                           | 71/127(55.9) | 66/125(52.8) | Female      | 0.69(0.40,1.19)      | 0.081   |
| Hospitalized, not requiring supplemental oxygen                       | 7/127(5.5)   | 5/125(4.0)   | Interaction | 0.91(0.33,2.51)      | 0.807   |
| Hospitalized, requiring supplemental oxygen                           | 1/127(0.8)   | 5/125(4.0)   |             |                      |         |
| Hospitalized, on non-invasive ventilation or high flow oxygen devices | 1/127(0.8)   |              |             |                      |         |
| Hospitalized, on invasive mechanical ventilation or ECMO              | 5/127(3.9)   | 3/125(2.4)   |             |                      |         |
| Death                                                                 | 15/127(11.8) | 23/125(18.4) |             |                      |         |
| Missing                                                               | 2/127(1.6)   | 1/125(0.8)   |             |                      |         |
| <b>Female</b>                                                         |              |              |             |                      |         |
| Not hospitalized, no limitations on activities                        | 15/87(17.2)  | 6/65(9.2)    |             |                      |         |
| Not hospitalized, limitations on activities                           | 58/87(66.7)  | 46/65(70.8)  |             |                      |         |
| Hospitalized, not requiring supplemental oxygen                       | 4/87(4.6)    | 2/65(3.1)    |             |                      |         |
| Hospitalized, requiring supplemental oxygen                           |              | 1/65(1.5)    |             |                      |         |
| Hospitalized, on invasive mechanical ventilation or ECMO              | 1/87(1.1)    | 2/65(3.1)    |             |                      |         |
| Death                                                                 | 8/87(9.2)    | 6/65(9.2)    |             |                      |         |

Missing

1/87(1.1)

2/65(3.1)

---

\*Adjusted for minimization variables; age and site (using clustered standard errors)

Baseline 7-point ordinal scale: (a) 3, (b) 4 and (c) 5

Table S4 shows the subgroup analysis for baseline 7-point ordinal scale. Overall, there was no evidence that the treatment effect was moderated by baseline ordinal scale: interaction effect 1 0.62 (0.20, 1.87); p-value = 0.261 and interaction 2 1.73(0.45, 6.65); p-value=0.293.

Table S4: Subgroup analysis for baseline 7-point ordinal scale

|                                                                       | Placebo      | Brensocaticib | Baseline<br>CSTAT     | Effect size (99%<br>CI) | p value |
|-----------------------------------------------------------------------|--------------|---------------|-----------------------|-------------------------|---------|
| <b>Baseline CSTAT = 3</b>                                             |              |               |                       |                         |         |
| Not hospitalized, no limitations on activities                        | 12/50(24.0)  | 9/42(21.4)    | Baseline<br>CSTAT = 3 | 0.94(0.41,2.15)         | 0.838   |
| Not hospitalized, limitations on activities                           | 32/50(64.0)  | 29/42(69.0)   | Baseline<br>CSTAT = 4 | 0.58(0.35,0.94)         | 0.004   |
| Hospitalized, not requiring supplemental oxygen                       | 4/50(8.0)    | 1/42(2.4)     | Interaction 1         | 0.62(0.20,1.87)         | 0.261   |
| Death                                                                 | 1/50(2.0)    | 3/42(7.1)     | Baseline<br>CSTAT = 5 | 0.62(0.24,1.57)         | 0.184   |
| Missing                                                               | 1/50(2.0)    |               | Interaction 2         | 1.73(0.45,6.65)         | 0.293   |
| <b>Baseline CSTAT = 4</b>                                             |              |               |                       |                         |         |
| Not hospitalized, no limitations on activities                        | 27/140(19.3) | 17/128(13.3)  |                       |                         |         |
| Not hospitalized, limitations on activities                           | 86/140(61.4) | 73/128(57.0)  |                       |                         |         |
| Hospitalized, not requiring supplemental oxygen                       | 6/140(4.3)   | 5/128(3.9)    |                       |                         |         |
| Hospitalized, requiring supplemental oxygen                           |              | 5/128(3.9)    |                       |                         |         |
| Hospitalized, on non-invasive ventilation or high flow oxygen devices | 1/140(0.7)   |               |                       |                         |         |
| Hospitalized, on invasive mechanical ventilation or ECMO              | 4/140(2.9)   | 4/128(3.1)    |                       |                         |         |
| Death                                                                 | 15/140(10.7) | 21/128(16.4)  |                       |                         |         |
| Missing                                                               | 1/140(0.7)   | 3/128(2.3)    |                       |                         |         |

Baseline CSTAT = 5

|                                                          |             |             |
|----------------------------------------------------------|-------------|-------------|
| Not hospitalized, no limitations on activities           | 1/24(4.2)   | 2/20(10.0)  |
| Not hospitalized, limitations on activities              | 11/24(45.8) | 10/20(50.0) |
| Hospitalized, not requiring supplemental oxygen          | 1/24(4.2)   | 1/20(5.0)   |
| Hospitalized, requiring supplemental oxygen              | 1/24(4.2)   | 1/20(5.0)   |
| Hospitalized, on invasive mechanical ventilation or ECMO | 2/24(8.3)   | 1/20(5.0)   |
| Death                                                    | 7/24(29.2)  | 5/20(25.0)  |
| Missing                                                  | 1/24(4.2)   |             |

\*Adjusted for minimization variables; age and site (using clustered standard errors)

#### Co-enrolment into RECOVERY: (a) Yes and (b) No

Table S5 shows the subgroup analysis for co-enrolment into RECOVERY trial. Overall, there was no evidence that the treatment effect was moderated by co-enrolment into RECOVERY trial: interaction effect 0.78 (0.41, 1.50); p-value = 0.327.

Table S5: Subgroup analysis for co-enrolment into RECOVERY

|                                                                       | Placebo      | Brensocaticib | Enrolment    | Effect size (99% CI) | p value |
|-----------------------------------------------------------------------|--------------|---------------|--------------|----------------------|---------|
| Not enrolled in RECOVERY                                              |              |               |              |                      |         |
| Not hospitalized, no limitations on activities                        | 25/149(16.8) | 21/142(14.8)  | Not enrolled | 0.78(0.54,1.13)      | 0.081   |
| Not hospitalized, limitations on activities                           | 88/149(59.1) | 85/142(59.9)  | Enrolled     | 0.61(0.36,1.04)      | 0.017   |
| Hospitalized, not requiring supplemental oxygen                       | 10/149(6.7)  | 4/142(2.8)    | Interaction  | 0.78(0.41,1.50)      | 0.327   |
| Hospitalized, requiring supplemental oxygen                           | 1/149(0.7)   | 4/142(2.8)    |              |                      |         |
| Hospitalized, on non-invasive ventilation or high flow oxygen devices | 1/149(0.7)   |               |              |                      |         |

|                                                          |              |              |
|----------------------------------------------------------|--------------|--------------|
| Hospitalized, on invasive mechanical ventilation or ECMO | 5/149(3.4)   | 3/142(2.1)   |
| Death                                                    | 16/149(10.7) | 23/142(16.2) |
| Missing                                                  | 3/149(2.0)   | 2/142(1.4)   |
| Enrolled in RECOVERY                                     |              |              |
| Not hospitalized, no limitations on activities           | 15/65(23.1)  | 7/48(14.6)   |
| Not hospitalized, limitations on activities              | 41/65(63.1)  | 27/48(56.3)  |
| Hospitalized, not requiring supplemental oxygen          | 1/65(1.5)    | 3/48(6.3)    |
| Hospitalized, requiring supplemental oxygen              |              | 2/48(4.2)    |
| Hospitalized, on invasive mechanical ventilation or ECMO | 1/65(1.5)    | 2/48(4.2)    |
| Death                                                    | 7/65(10.8)   | 6/48(12.5)   |
| Missing                                                  |              | 1/48(2.1)    |

\*Adjusted for minimization variables; age and site (using clustered standard errors)

#### Symptom duration (days): (a) <10 and (b) ≥10

Table S6 shows the subgroup analysis for duration of COVID symptoms. Overall, there was no evidence that the treatment effect was moderated by duration of COVID symptoms: interaction effect 1.51 (0.35, 6.41); p-value = 0.467.

Table S6: Subgroup analysis for duration of symptoms

|                                                | Placebo      | Brensocaticib | Duration of symptom | Effect size (99% CI) | p value |
|------------------------------------------------|--------------|---------------|---------------------|----------------------|---------|
| Less than 10 days                              |              |               |                     |                      |         |
| Not hospitalized, no limitations on activities | 27/136(19.9) | 12/102(11.8)  | Less than 10 days   | 0.60(0.33,1.08)      | 0.026   |
| Not hospitalized, limitations on activities    | 76/136(55.9) | 58/102(56.9)  | 10 days or more     | 0.90(0.33,2.46)      | 0.787   |

|                                                                       |              |              |             |                 |       |
|-----------------------------------------------------------------------|--------------|--------------|-------------|-----------------|-------|
| Hospitalized, not requiring supplemental oxygen                       | 7/136(5.1)   | 4/102(3.9)   | Interaction | 1.51(0.35,6.41) | 0.467 |
| Hospitalized, requiring supplemental oxygen                           | 1/136(0.7)   | 5/102(4.9)   |             |                 |       |
| Hospitalized, on non-invasive ventilation or high flow oxygen devices | 1/136(0.7)   |              |             |                 |       |
| Hospitalized, on invasive mechanical ventilation or ECMO              | 5/136(3.7)   | 4/102(3.9)   |             |                 |       |
| Death                                                                 | 16/136(11.8) | 17/102(16.7) |             |                 |       |
| Missing                                                               | 3/136(2.2)   | 2/102(2.0)   |             |                 |       |
| 10 days or more                                                       |              |              |             |                 |       |
| Not hospitalized, no limitations on activities                        | 13/78(16.7)  | 16/88(18.2)  |             |                 |       |
| Not hospitalized, limitations on activities                           | 53/78(67.9)  | 54/88(61.4)  |             |                 |       |
| Hospitalized, not requiring supplemental oxygen                       | 4/78(5.1)    | 3/88(3.4)    |             |                 |       |
| Hospitalized, requiring supplemental oxygen                           |              | 1/88(1.1)    |             |                 |       |
| Hospitalized, on invasive mechanical ventilation or ECMO              | 1/78(1.3)    | 1/88(1.1)    |             |                 |       |
| Death                                                                 | 7/78(9.0)    | 12/88(13.6)  |             |                 |       |
| Missing                                                               |              | 1/88(1.1)    |             |                 |       |

---

\*Adjusted for minimization variables; age and site (using clustered standard errors)



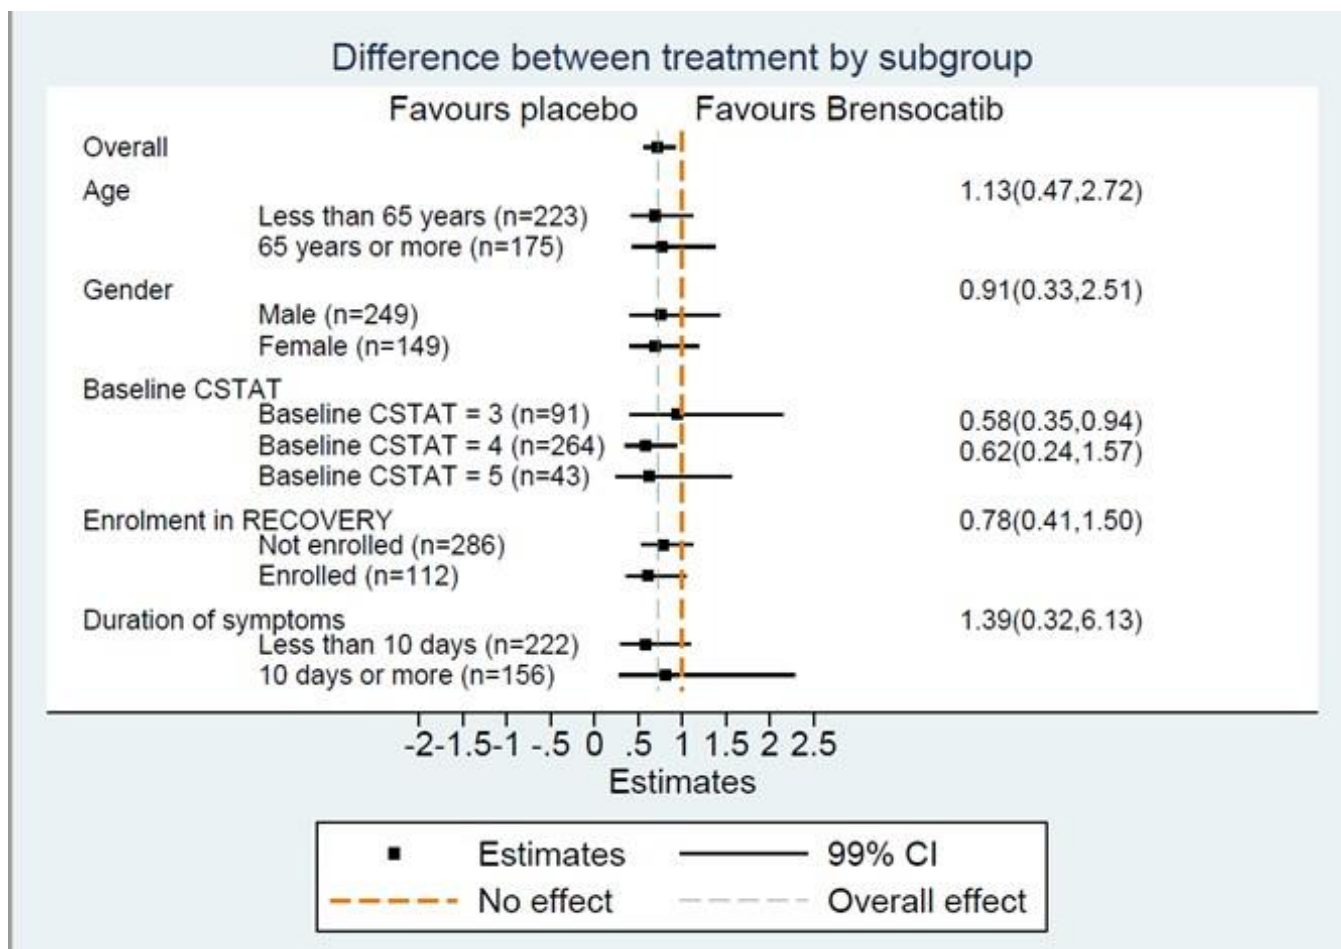

Figure S1: Forest plot for each subgroup. N=398 as 6 participants were lost to follow-up

### Per-protocol analysis

In total, there were 71 participants (35 in placebo arm and 36 in Brensocatib arm) who discontinued trial drug during the study period. After excluding these participants, 179 participants in the placebo arm and 154 in Brensocatib arm were included in the per-protocol analysis. Table S7 shows the pre-protocol analysis. The unadjusted odds ratio (95% confidence interval) from a proportional odds model was 0.81 (0.52 to 1.25).

Table S7: Per-protocol analysis for primary outcome

|                                                   | Placebo<br>N=179 | Brensocatib<br>N=154 | Model            | Effect size (95%<br>CI) | p value |
|---------------------------------------------------|------------------|----------------------|------------------|-------------------------|---------|
| Not hospitalized, no limitations<br>on activities | 33 (18.4)        | 24 (15.6)            | Unadjusted Model | 0.81(0.52,1.25)         | 0.340   |

|                                                          |            |           |                          |                 |       |
|----------------------------------------------------------|------------|-----------|--------------------------|-----------------|-------|
| Not hospitalized, limitations on activities              | 116 (64.8) | 99 (64.3) | Adjusted Model*          | 0.79(0.60,1.06) | 0.114 |
| Hospitalized, not requiring supplemental oxygen          | 9 (5.0)    | 6 (3.9)   | Adjusted Model#          | 0.81(0.61,1.08) | 0.149 |
| Hospitalized, requiring supplemental oxygen              | 1 (0.6)    | 6 (3.9)   | for additional variables |                 |       |
| Hospitalized, on invasive mechanical ventilation or ECMO | 2 (1.1)    | 1 (0.6)   |                          |                 |       |
| Death                                                    | 17 (9.5)   | 17 (11.0) |                          |                 |       |
| Missing                                                  | 1 (0.6)    | 1 (0.6)   |                          |                 |       |

\*Adjusted for minimization variables; age and site (using clustered standard errors)

#Adjusted for gender, hypertension, and chronic obstructive pulmonary disease and minimization variables; age and site (using clustered standard errors)

### Clinical status at Day 3, 5, 8, 11 and 15

The number and percentage of participants in each clinical status category for day 3, 5, 8, 11 and 15 are summarized and reported in Table S8.

Table S8: Clinical status at day 3, 5, 8, 11 and 15

|       |                                                                       | Placebo<br>N=214 | Brensocaticib<br>N=190 |
|-------|-----------------------------------------------------------------------|------------------|------------------------|
| Day 3 | Not hospitalized, no limitations on activities                        | 3(1.4)           | 2(1.1)                 |
|       | Not hospitalized, limitations on activities                           | 35(16.4)         | 21(11.1)               |
|       | Hospitalized, not requiring supplemental oxygen                       | 45(21.0)         | 41(21.6)               |
|       | Hospitalized, requiring supplemental oxygen                           | 93(43.5)         | 90(47.4)               |
|       | Hospitalized, on non-invasive ventilation or high flow oxygen devices | 33(15.4)         | 32(16.8)               |
|       | Hospitalized, on invasive mechanical ventilation or ECMO              | 1(0.5)           | 3(1.6)                 |
|       | Death                                                                 | 3(1.4)           |                        |
|       | Missing                                                               | 1(0.5)           | 1(0.5)                 |
| Day 5 | Not hospitalized, no limitations on activities                        | 4(1.9)           | 6(3.2)                 |
|       | Not hospitalized, limitations on activities                           | 68(31.8)         | 51(26.8)               |
|       | Hospitalized, not requiring supplemental oxygen                       | 46(21.5)         | 38(20.0)               |
|       | Hospitalized, requiring supplemental oxygen                           | 59(27.6)         | 53(27.9)               |

|        |                                                                       |           |           |
|--------|-----------------------------------------------------------------------|-----------|-----------|
|        | Hospitalized, on non-invasive ventilation or high flow oxygen devices | 24(11.2)  | 33(17.4)  |
|        | Hospitalized, on invasive mechanical ventilation or ECMO              | 5(2.3)    | 5(2.6)    |
|        | Death                                                                 | 6(2.8)    | 2(1.1)    |
|        | Missing                                                               | 2(0.9)    | 2(1.1)    |
| Day 8  | Not hospitalized, no limitations on activities                        | 18(8.4)   | 9(4.7)    |
|        | Not hospitalized, limitations on activities                           | 98(45.8)  | 84(44.2)  |
|        | Hospitalized, not requiring supplemental oxygen                       | 27(12.6)  | 23(12.1)  |
|        | Hospitalized, requiring supplemental oxygen                           | 37(17.3)  | 34(17.9)  |
|        | Hospitalized, on non-invasive ventilation or high flow oxygen devices | 17(7.9)   | 18(9.5)   |
|        | Hospitalized, on invasive mechanical ventilation or ECMO              | 6(2.8)    | 7(3.7)    |
|        | Death                                                                 | 9(4.2)    | 11(5.8)   |
|        | Missing                                                               | 2(0.9)    | 4(2.1)    |
| Day 11 | Not hospitalized, no limitations on activities                        | 18(8.4)   | 14(7.4)   |
|        | Not hospitalized, limitations on activities                           | 122(57.0) | 100(52.6) |
|        | Hospitalized, not requiring supplemental oxygen                       | 20(9.3)   | 14(7.4)   |
|        | Hospitalized, requiring supplemental oxygen                           | 22(10.3)  | 24(12.6)  |
|        | Hospitalized, on non-invasive ventilation or high flow oxygen devices | 7(3.3)    | 6(3.2)    |
|        | Hospitalized, on invasive mechanical ventilation or ECMO              | 8(3.7)    | 10(5.3)   |
|        | Death                                                                 | 14(6.5)   | 16(8.4)   |
|        | Missing                                                               | 3(1.4)    | 6(3.2)    |
| Day 15 | Not hospitalized, no limitations on activities                        | 26(12.1)  | 22(11.6)  |
|        | Not hospitalized, limitations on activities                           | 124(57.9) | 103(54.2) |
|        | Hospitalized, not requiring supplemental oxygen                       | 19(8.9)   | 12(6.3)   |
|        | Hospitalized, requiring supplemental oxygen                           | 13(6.1)   | 16(8.4)   |
|        | Hospitalized, on non-invasive ventilation or high flow oxygen devices | 5(2.3)    | 3(1.6)    |
|        | Hospitalized, on invasive mechanical ventilation or ECMO              | 6(2.8)    | 9(4.7)    |
|        | Death                                                                 | 18(8.4)   | 20(10.5)  |
|        | Missing                                                               | 3(1.4)    | 5(2.6)    |

\*Numbers in cells are n(%)

**Table S9- neutrophil elastase activity (substudy at Dundee and Sheffield sites only).**

|        | Placebo<br>N=214 | Brensocatib<br>N=190 | Effect estimate (95%<br>CI) |
|--------|------------------|----------------------|-----------------------------|
| Day 1  | 132 (86);[N=77]  | 134 (113);[N=75]     | n/a                         |
| Day 8  | 163 (102);[N=32] | 131 (64);[N=25]      | -40 (-84, 5)                |
| Day 15 | 167 (127);[N=13] | 85 (69);[N=16]       | -83 (-141, -23)             |
| Day 29 | 166 (97);[N=48]  | 103 (65);[N=50]      | -67 (-102, -31)             |

Cells are mean, (SD) [N], effect estimates come from a linear repeated measures mixed model and estimate the difference between groups at each time point.

#### **Adverse events, system organ class (SOC) and preferred term level**

Tables S10 and S11 show the adverse events reported during the study. Overall, 185 participants (99 (46.3%) in placebo arm and 86 (44.8%) in Brensocatib arm) reported at least one adverse event (IRR: 0.97 (95% CI 0.73, 1.29); p=0.827). There were in total, 296 events; 164 in placebo and 132 in Brensocatib. The most common adverse events were gastrointestinal disorders and infections and infestations.

Table S10: Adverse events and system organ class

|                                               | Placebo<br>N=214 | Brensocatib<br>N=192 |
|-----------------------------------------------|------------------|----------------------|
| Number of participants with no adverse events | 115(53.7)        | 106(55.2)            |
| Number of participants with adverse events    | 99(46.3)         | 86(44.8)             |

|                                                                        |          |          |
|------------------------------------------------------------------------|----------|----------|
| Number of adverse events                                               | 164      | 132      |
| Severity                                                               |          |          |
| Mild                                                                   | 95(57.9) | 67(50.8) |
| Moderate                                                               | 35(21.3) | 23(17.4) |
| Severe                                                                 | 34(20.7) | 42(31.8) |
| System Organ Class level                                               |          |          |
| Blood and lymphatic system disorders                                   | 1(0.6)   | 0        |
| Cardiac disorders                                                      | 4(2.4)   | 7(5.3)   |
| Eye disorders                                                          | 2(1.2)   | 2(1.5)   |
| Gastrointestinal disorders                                             | 43(26.2) | 19(14.4) |
| General disorders and administration site conditions                   | 7(4.3)   | 8(6.1)   |
| Hepatobiliary disorders                                                | 1(0.6)   | 1(0.8)   |
| Infections and infestations                                            | 33(20.1) | 33(25.0) |
| Injury, poisoning and procedural complications                         | 0        | 1(0.8)   |
| Investigations                                                         | 7(4.3)   | 6(4.5)   |
| Metabolism and nutrition disorders                                     | 5(3.0)   | 5(3.8)   |
| Musculoskeletal and connective tissue disorders                        | 8(4.9)   | 4(3.0)   |
| Neoplasms benign, malignant and unspecified (incl<br>cysts and polyps) | 1(0.6)   | 1(0.8)   |
| Nervous system disorders                                               | 12(7.3)  | 11(8.3)  |
| Psychiatric disorders                                                  | 6(3.7)   | 2(1.5)   |
| Renal and urinary disorders                                            | 4(2.4)   | 2(1.5)   |
| Respiratory, thoracic and mediastinal disorders                        | 13(7.9)  | 16(12.1) |
| Skin and subcutaneous tissue disorders                                 | 16(9.8)  | 12(9.1)  |
| Vascular disorders                                                     | 1(0.6)   | 2(1.5)   |

\*Numbers in cells are n(%)

Table S11: Summary of all adverse events – Preferred Term Level

|                                               | Placebo<br>N=214 | Brensocaticib<br>N=192 |
|-----------------------------------------------|------------------|------------------------|
| Number of participants with no adverse events | 115(53.7)        | 106(55.2)              |
| Number of participants with adverse events    | 99(46.3)         | 86(44.8)               |
| Number of adverse events                      | 164              | 132                    |
| Preferred Term Level                          |                  |                        |
| Abdominal pain                                | 5(3.0)           | 0                      |

|                                    |          |         |
|------------------------------------|----------|---------|
| Acne                               | 1(0.6)   | 0       |
| Acute coronary syndrome            | 0        | 1(0.8)  |
| Acute kidney injury                | 1(0.6)   | 2(1.5)  |
| Alanine aminotransferase increased | 4(2.4)   | 2(1.5)  |
| Anaemia                            | 1(0.6)   | 0       |
| Arthralgia                         | 4(2.4)   | 2(1.5)  |
| Arthritis bacterial                | 0        | 1(0.8)  |
| Atrial fibrillation                | 2(1.2)   | 0       |
| Back pain                          | 0        | 1(0.8)  |
| Blood glucose abnormal             | 1(0.6)   | 1(0.8)  |
| Blood glucose increased            | 1(0.6)   | 0       |
| Bradycardia                        | 1(0.6)   | 1(0.8)  |
| COVID-19                           | 17(10.4) | 13(9.8) |
| COVID-19 pneumonia                 | 2(1.2)   | 9(6.8)  |
| Candida infection                  | 0        | 1(0.8)  |
| Cerebellar infarction              | 0        | 1(0.8)  |
| Cerebral infarction                | 0        | 1(0.8)  |
| Cerebrovascular accident           | 0        | 1(0.8)  |
| Chest discomfort                   | 0        | 2(1.5)  |
| Chest pain                         | 3(1.8)   | 0       |
| Cholelithiasis                     | 1(0.6)   | 0       |
| Chronic lymphocytic leukaemia      | 0        | 1(0.8)  |
| Clostridium difficile infection    | 0        | 1(0.8)  |
| Cold sweat                         | 1(0.6)   | 0       |
| Constipation                       | 4(2.4)   | 1(0.8)  |
| Coronavirus infection              | 0        | 1(0.8)  |
| Deep vein thrombosis               | 1(0.6)   | 0       |
| Delirium                           | 3(1.8)   | 0       |
| Diarrhoea                          | 2(1.2)   | 0       |
| Diverticulitis                     | 1(0.6)   | 0       |
| Dizziness                          | 5(3.0)   | 3(2.3)  |
| Drug eruption                      | 0        | 1(0.8)  |
| Dry mouth                          | 2(1.2)   | 1(0.8)  |
| Dry skin                           | 1(0.6)   | 2(1.5)  |
| Dysarthria                         | 1(0.6)   | 0       |
| Dyspepsia                          | 4(2.4)   | 3(2.3)  |
| Dyspnoea                           | 4(2.4)   | 1(0.8)  |
| Dysuria                            | 1(0.6)   | 0       |

|                                    |        |        |
|------------------------------------|--------|--------|
| Eczema                             | 1(0.6) | 0      |
| Electrocardiogram abnormal         | 1(0.6) | 0      |
| Epistaxis                          | 0      | 3(2.3) |
| Extravasation                      | 0      | 1(0.8) |
| Eye pruritus                       | 1(0.6) | 0      |
| Fall                               | 0      | 1(0.8) |
| Feeling hot                        | 1(0.6) | 0      |
| Flatulence                         | 1(0.6) | 0      |
| Gastritis erosive                  | 0      | 1(0.8) |
| Gastroesophageal reflux disease    | 1(0.6) | 1(0.8) |
| Gingival bleeding                  | 0      | 1(0.8) |
| Gingival pain                      | 1(0.6) | 0      |
| Glossodynia                        | 1(0.6) | 1(0.8) |
| Glycosylated haemoglobin increased | 0      | 1(0.8) |
| Gout                               | 1(0.6) | 0      |
| Hallucination, visual              | 0      | 1(0.8) |
| Headache                           | 2(1.2) | 2(1.5) |
| Hepatic function abnormal          | 0      | 1(0.8) |
| Hiccups                            | 1(0.6) | 2(1.5) |
| Hyperglycaemia                     | 2(1.2) | 4(3.0) |
| Hyperhidrosis                      | 1(0.6) | 0      |
| Hypoaesthesia                      | 1(0.6) | 0      |
| Hypoaesthesia oral                 | 0      | 1(0.8) |
| Hypokalaemia                       | 0      | 1(0.8) |
| Hypomagnesaemia                    | 1(0.6) | 0      |
| Hypoxia                            | 0      | 1(0.8) |
| Insomnia                           | 2(1.2) | 0      |
| Interstitial lung disease          | 1(0.6) | 0      |
| Intestinal ischaemia               | 0      | 1(0.8) |
| Lip pain                           | 0      | 1(0.8) |
| Lip swelling                       | 1(0.6) | 0      |
| Liver function test abnormal       | 0      | 1(0.8) |
| Lower gastrointestinal haemorrhage | 1(0.6) | 0      |
| Lower respiratory tract infection  | 2(1.2) | 1(0.8) |
| Malaise                            | 1(0.6) | 0      |
| Memory impairment                  | 0      | 1(0.8) |
| Metastases to liver                | 1(0.6) | 0      |
| Mouth ulceration                   | 1(0.6) | 2(1.5) |

|                                     |        |        |
|-------------------------------------|--------|--------|
| Multiple organ dysfunction syndrome | 0      | 1(0.8) |
| Muscle spasms                       | 0      | 1(0.8) |
| Musculoskeletal pain                | 1(0.6) | 0      |
| Nausea                              | 3(1.8) | 3(2.3) |
| Neck pain                           | 1(0.6) | 0      |
| Night sweats                        | 1(0.6) | 0      |
| Nightmare                           | 0      | 1(0.8) |
| Non-cardiac chest pain              | 1(0.6) | 0      |
| Oedema peripheral                   | 1(0.6) | 1(0.8) |
| Oesophagitis                        | 1(0.6) | 0      |
| Oral candidiasis                    | 3(1.8) | 0      |
| Oral mucosal blistering             | 1(0.6) | 0      |
| Oral mucosal eruption               | 1(0.6) | 0      |
| Oral pain                           | 1(0.6) | 0      |
| Pain in jaw                         | 1(0.6) | 0      |
| Palpitations                        | 0      | 2(1.5) |
| Pancreatic cyst                     | 1(0.6) | 0      |
| Paraesthesia                        | 0      | 1(0.8) |
| Paraesthesia oral                   | 1(0.6) | 0      |
| Peripheral ischaemia                | 0      | 2(1.5) |
| Peripheral swelling                 | 0      | 2(1.5) |
| Pharyngitis                         | 1(0.6) | 0      |
| Plantar fasciitis                   | 1(0.6) | 0      |
| Pneumonia                           | 1(0.6) | 2(1.5) |
| Pneumonitis                         | 1(0.6) | 0      |
| Pneumothorax                        | 1(0.6) | 3(2.3) |
| Pneumothorax spontaneous            | 0      | 1(0.8) |
| Pollakiuria                         | 2(1.2) | 0      |
| Pruritus                            | 1(0.6) | 1(0.8) |
| Pulmonary embolism                  | 5(3.0) | 4(3.0) |
| Rash                                | 7(4.3) | 5(3.8) |
| Rash macular                        | 1(0.6) | 0      |
| Rash pruritic                       | 1(0.6) | 1(0.8) |
| Rash pustular                       | 1(0.6) | 0      |
| Rectal haemorrhage                  | 1(0.6) | 0      |
| Respiratory tract infection         | 1(0.6) | 0      |
| Right ventricular failure           | 1(0.6) | 0      |
| Serratia infection                  | 0      | 1(0.8) |



|                              |        |        |
|------------------------------|--------|--------|
| Sinus bradycardia            | 0      | 1(0.8) |
| Sputum increased             | 0      | 1(0.8) |
| Staphylococcal bacteraemia   | 0      | 1(0.8) |
| Steroid diabetes             | 1(0.6) | 0      |
| Subarachnoid haemorrhage     | 0      | 1(0.8) |
| Subcutaneous emphysema       | 0      | 1(0.8) |
| Suicidal ideation            | 1(0.6) | 0      |
| Supraventricular tachycardia | 0      | 1(0.8) |
| Swelling face                | 0      | 1(0.8) |
| Swollen tongue               | 1(0.6) | 1(0.8) |
| Syncope                      | 3(1.8) | 0      |
| Tachyarrhythmia              | 0      | 1(0.8) |
| Tongue blistering            | 1(0.6) | 0      |
| Tongue discolouration        | 1(0.6) | 0      |
| Tongue erythema              | 1(0.6) | 0      |
| Toothache                    | 1(0.6) | 0      |
| Transaminases increased      | 0      | 1(0.8) |
| Urinary tract infection      | 1(0.6) | 2(1.5) |
| Urosepsis                    | 1(0.6) | 0      |
| Urticaria                    | 0      | 1(0.8) |
| Vision blurred               | 1(0.6) | 2(1.5) |
| Vomiting                     | 4(2.4) | 1(0.8) |
| Vulvovaginal candidiasis     | 2(1.2) | 0      |

\*Numbers in cells are n(%)

Table S12 shows the details of the adverse events. Of 296 events reported, 64 (39.0%) in placebo arm and 48 (36.4%) were possibly due to the treatment received and 92 (56.1%) and 56(42.4%) in placebo and Brensocatib arms recovered, respectively.

Table S12: Details of adverse events

|                                            | Placebo<br>N=214 | Brensocatib<br>N=192 |
|--------------------------------------------|------------------|----------------------|
| Number of participants with adverse events | 99(46.3)         | 86(44.8)             |
| Number of adverse events                   | 164              | 132                  |

#### Details of adverse events

Relationship to trial drug

|                                             |          |          |
|---------------------------------------------|----------|----------|
| None                                        | 98(59.8) | 80(60.6) |
| Probable                                    | 2(1.2)   | 4(3.0)   |
| Possible                                    | 64(39.0) | 48(36.4) |
| <b>Action Taken</b>                         |          |          |
| IMP permanently stopped                     | 10(6.1)  | 10(7.6)  |
| IMP temporarily stopped                     | 2(1.2)   | 3(2.3)   |
| Others                                      | 22(13.4) | 19(14.4) |
| Hospitalisation, IMP temporarily stopped    | 1(0.6)   | 0        |
| Hospitalisation, Con meds commenced, Others | 1(0.6)   | 0        |
| IMP temporarily stopped, Others             | 0        | 1(0.8)   |
| Con meds commenced                          | 38(23.2) | 24(18.2) |
| IMP permanently stopped, Con meds commenced | 0        | 2(1.5)   |
| Hospitalisation, Con meds commenced         | 1(0.6)   | 0        |
| Hospitalisation                             | 9(5.5)   | 6(4.5)   |
| Con meds commenced, Others                  | 0        | 1(0.8)   |
| None                                        | 79(48.2) | 65(49.2) |
| Missing                                     | 1(0.6)   | 1(0.8)   |
| <b>Outcome</b>                              |          |          |
| Recovering                                  | 13(7.9)  | 17(12.9) |
| Recovered with sequelae                     | 1(0.6)   | 4(3.0)   |
| Recovered                                   | 92(56.1) | 56(42.4) |
| Unknown                                     | 7(4.3)   | 2(1.5)   |
| Not recovered                               | 27(16.5) | 25(18.9) |
| Fatal                                       | 24(14.6) | 28(21.2) |

\*Numbers in cells are n(%)

### Serious adverse events and system organ class level

Of 406 participants, 75 (18.5%) had at least one serious adverse event; 35 (16.4%) in placebo arm and 40 (20.8%) in Brensocatib arm (IRR: 1.27 (95%CI 0.81, 2.01); p=0.30). There were 81 SAEs in total; 39 in placebo arm and 42 in Brensocatib arm. The most common serious adverse events were infections and infestations (table S13).

Table S13: Serious adverse events

|  | Placebo | Brensocatib |
|--|---------|-------------|
|--|---------|-------------|

|                                                                     | N=214     | N=192     |
|---------------------------------------------------------------------|-----------|-----------|
| Number of participants with no serious adverse events               | 179(83.6) | 152(79.2) |
| Number of participants with serious adverse events                  | 35(16.4)  | 40(20.8)  |
| Number of SAEs                                                      | 39        | 42        |
| System Organ Class Level                                            |           |           |
| Cardiac disorders                                                   | 1(2.6)    | 0         |
| Gastrointestinal disorders                                          | 3(7.7)    | 1(2.4)    |
| General disorders and administration site conditions                | 0         | 1(2.4)    |
| Infections and infestations                                         | 23(59.0)  | 26(61.9)  |
| Neoplasms benign, malignant and unspecified (incl cysts and polyps) | 1(2.6)    | 0         |
| Nervous system disorders                                            | 2(5.1)    | 4(9.5)    |
| Psychiatric disorders                                               | 2(5.1)    | 0         |
| Renal and urinary disorders                                         | 1(2.6)    | 0         |
| Respiratory, thoracic and mediastinal disorders                     | 5(12.8)   | 7(16.7)   |
| Skin and subcutaneous tissue disorders                              | 0         | 2(4.8)    |
| Vascular disorders                                                  | 1(2.6)    | 1(2.4)    |

\*Numbers in cells are n(%)

Table S14: Causes of death and relatedness to study drug

|                                  |                                     | Placebo<br>N=23 | Brensocatib<br>N=29 |
|----------------------------------|-------------------------------------|-----------------|---------------------|
| Relationship with the trial drug | None                                | 22(95.7)        | 29(100.0)           |
|                                  | Possible                            | 1(4.3)          |                     |
| Cause of death                   | COVID-19                            | 17(73.9)        | 12(41.4)            |
|                                  | COVID-19 pneumonia                  | 2(8.7)          | 9(31.0)             |
|                                  | Cerebellar infarction               |                 | 1(3.4)              |
|                                  | Coronavirus infection               |                 | 1(3.4)              |
|                                  | Interstitial lung disease           | 1(4.3)          |                     |
|                                  | Intestinal ischaemia                |                 | 1(3.4)              |
|                                  | Lower respiratory tract infection   | 1(4.3)          |                     |
|                                  | Carcinoma with metastases to liver  | 1(4.3)          |                     |
|                                  | Multiple organ dysfunction syndrome |                 | 1(3.4)              |
|                                  | Pneumonia                           | 1(4.3)          | 1(3.4)              |
|                                  | Pulmonary embolism                  |                 | 1(3.4)              |
|                                  | Subarachnoid haemorrhage            |                 | 1(3.4)              |
|                                  | Not recorded                        |                 | 1 (3.4)             |

\*Numbers in cells are n(%)

Table S15: Quality of life assessments using the EQ-5D-5L assessment tool

|                                                              | <b>Placebo<br/>(N=151)</b> | <b>Brensocaticib<br/>(n=190)</b> | <b>Model</b> | <b>Effect size<br/>(95% CI)</b> | <b>p-value</b> |
|--------------------------------------------------------------|----------------------------|----------------------------------|--------------|---------------------------------|----------------|
| <b>Mean (SD)</b>                                             | 0.670 (0.248)              | 0.674 (0.289)                    | Unadjusted   | 0.004 (-<br>0.059,0.066)        | p=0.912        |
| <b>Median (25<sup>th</sup>,<br/>75<sup>th</sup> centile)</b> | 0.735<br>(0.548,0.0837)    | 0.753<br>(0.592,0.850)           | Adjusted     | 0.003 (-<br>0.060,0.066)        | P=0.923        |

\*Adjusted for minimization variables; age and site (using clustered standard errors)
